# Supplementary material for: Racial Disparities in Breast Cancer Outcomes in the Metropolitan Atlanta Area: New Insights and Approaches for Health Equity
Source: PubMed Central journal article supplement — JNCI Cancer Spectr. 2019 Aug 7;3(3):pkz053. doi: 10.1093/jncics/pkz053 (PMC7049995; doi:10.1093/jncics/pkz053), 2019-08-07
Supplement: pkz053_supplementary_data.pdf [file pkz053_supplementary_data.pdf]

**Racial disparities in breast cancer outcomes in the metropolitan Atlanta area: new insights and approaches for health equity**

Lindsay J. Collin,<sup>1</sup> Renjian Jiang,<sup>1</sup> Kevin C. Ward,<sup>1</sup> Keerthi Gogineni,<sup>2</sup> Preeti D. Subhedar,<sup>2</sup> Mark E. Sherman,<sup>3</sup>

Mia M. Gaudet,<sup>4</sup> Carmen Radecki Breitkopf,<sup>5</sup> Olivia D'Angelo,<sup>2</sup> Sheryl GA Garbram-Mendola,<sup>2</sup> Ritu Aneja,<sup>6</sup>

Anne H. Gaglioti,<sup>7</sup> Lauren E. McCullough<sup>1</sup>

**Supplemental Figure 1:** Directed Acyclic Graph (DAG) for the relationship between race, breast cancer-specific mortality, and patient, tumor, and treatment characteristics.

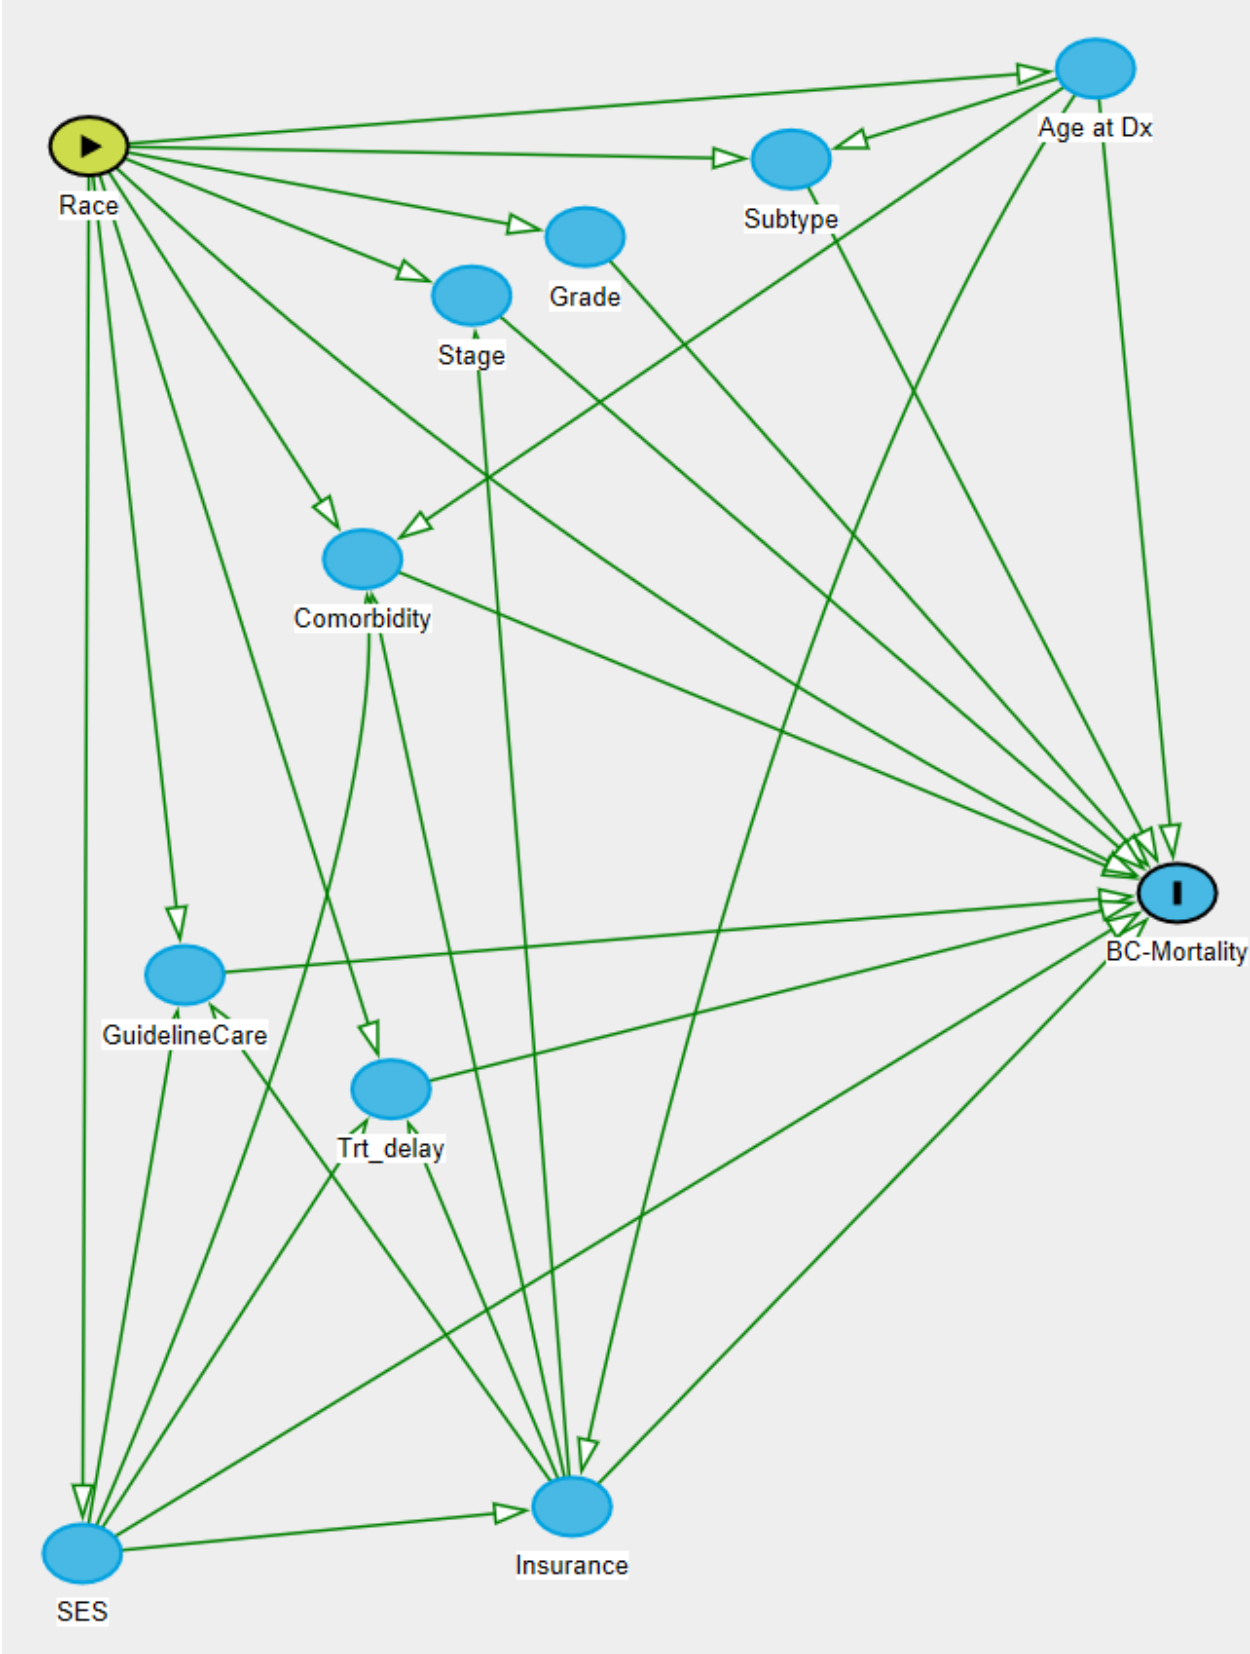

Code generated from online resource Daggity (<http://www.dagitty.net/dags.html#>) for the above causal diagram.

**Code:**

Age%20at%20Dx 1 @0.943,-0.017

BC-Mortality O @1.018,0.546

Comorbidity 1 @0.271,0.318

Grade 1 @0.475,0.098

GuidelineCare 1 @0.108,0.602

Insurance 1 @0.463,0.965

Race E @0.020,0.036

SES 1 @0.014,0.997

Stage 1 @0.371,0.138

Subtype 1 @0.664,0.045

Trt\_delay 1 @0.297,0.680

Age%20at%20Dx BC-Mortality Comorbidity Insurance @0.665,0.288 Race Subtype

Comorbidity BC-Mortality

Grade BC-Mortality

GuidelineCare BC-Mortality

Insurance BC-Mortality Comorbidity GuidelineCare Stage Trt\_delay

Race BC-Mortality @0.467,0.342 Comorbidity Grade GuidelineCare SES Stage Subtype  
Trt\_delay

SES BC-Mortality Comorbidity @0.297,0.509 GuidelineCare Insurance Trt\_delay

Stage BC-Mortality

Subtype BC-Mortality

Trt\_delay BC-Mortality

**Supplemental Table 1.** Multivariable adjusted\* hazard ratios (HR) and 95% confidence intervals (95% CI) for breast cancer-specific death according to race and tumor characteristics among non-Hispanic White (NHW) and non-Hispanic Black (NHB) women diagnosed with breast cancer in the metropolitan Atlanta area 2010–2014 and registered with the Georgia Cancer Registry.

| Characteristics          | No. Deaths |     | Common Referent HR (95% CI) |                      | RERI (95% CI)       |
|--------------------------|------------|-----|-----------------------------|----------------------|---------------------|
|                          | NHW        | NHB | NHW                         | NHB                  |                     |
|                          | N          | N   | HR (95% CI)                 |                      |                     |
| <b>Stage</b>             |            |     |                             |                      |                     |
| I                        | 31         | 29  | Reference                   | 1.64 (0.98, 2.72)    | --                  |
| II                       | 80         | 118 | 4.03 (2.63, 6.17)           | 5.51 (3.64, 8.35)    | 0.85 (−0.67, 2.37)  |
| III                      | 85         | 126 | 13.97 (8.96, 21.78)         | 17.47 (11.36, 26.88) | 2.87 (−1.77, 7.50)  |
| IV                       | 123        | 215 | 32.89 (21.02, 51.46)        | 54.59 (35.35, 84.31) | 21.06 (7.44, 34.69) |
| <b>Grade</b>             |            |     |                             |                      |                     |
| 1                        | 20         | 14  | Reference                   | 1.86 (0.93, 3.75)    | --                  |
| 2                        | 97         | 119 | 1.62 (0.99, 2.64)           | 2.68 (1.65, 4.37)    | 0.20 (−1.03, 1.44)  |
| 3+                       | 154        | 286 | 3.09 (1.90, 5.01)           | 3.50 (2.17, 5.65)    | −0.45 (−1.82, 0.93) |
| <b>ER Status</b>         |            |     |                             |                      |                     |
| ER+                      | 209        | 282 | Reference                   | 1.59 (1.31, 1.93)    | --                  |
| ER-                      | 90         | 189 | 3.16 (1.75, 5.71)           | 3.79 (2.15, 6.66)    | 0.04 (−0.91, 0.99)  |
| <b>Molecular Subtype</b> |            |     |                             |                      |                     |
| Luminal A                | 171        | 221 | Reference                   | 1.64 (1.33, 2.01)    | --                  |
| Luminal B                | 31         | 56  | 1.12 (0.72, 1.76)           | 1.48 (1.02, 2.16)    | −0.28 (−0.91, 0.35) |
| HER2 Overexpressing      | 16         | 40  | 1.12 (0.63, 1.99)           | 2.01 (1.32, 3.07)    | 0.25 (−0.64, 1.14)  |
| TNBC                     | 65         | 137 | 3.11 (2.25, 4.29)           | 3.44 (2.62, 4.51)    | −0.31 (−1.31, 0.69) |

\*Adjusted for age; stage; subtype; receipt of surgery, chemotherapy, radiation, hormone therapy, and trastuzumab; insurance status

**Supplemental Table 2.** Multivariable adjusted\* hazard ratios (HR) and 95% confidence intervals (95% CI) for breast cancer-specific death according to race and treatment parameters among non-Hispanic White (NHW) and non-Hispanic Black (NHB) women diagnosed with breast cancer in the metropolitan Atlanta area 2010–2014 and registered with the Georgia Cancer Registry.

| Characteristics           | No. Deaths |     | Common Referent HR (95% CI) |                   | RERI (95% CI)       |
|---------------------------|------------|-----|-----------------------------|-------------------|---------------------|
|                           | NHW        | NHB | NHW                         | NHB               |                     |
|                           | N          | N   | HR (95% CI)                 |                   |                     |
| <b>Surgery</b>            |            |     |                             |                   |                     |
| No                        | 139        | 241 | Reference                   | 1.47 (1.16, 1.86) | --                  |
| Breast Conserving Surgery | 59         | 76  | 0.32 (0.22, 0.46)           | 0.44 (0.31, 0.62) | −0.35 (−0.70, 0.06) |

|                                                     |     |     |                    |                    |                     |
|-----------------------------------------------------|-----|-----|--------------------|--------------------|---------------------|
| Mastectomy                                          | 121 | 171 | 0.42 ( 0.31, 0.57) | 0.64 ( 0.48, 0.85) | -0.25 (-0.59, 0.09) |
| <b>Chemotherapy</b>                                 |     |     |                    |                    |                     |
| No                                                  | 103 | 124 | 0.83 ( 0.62, 1.11) | 1.63 (1.23, 2.15)  | 0.47 (0.06, 0.88)   |
| Yes                                                 | 171 | 317 | Reference          | 1.33 (1.09, 1.63)  | --                  |
| <b>Radiation</b>                                    |     |     |                    |                    |                     |
| No                                                  | 164 | 238 | 1.13 ( 0.87, 1.47) | 1.63 (1.28, 2.09)  | -0.03 (-0.44, 0.38) |
| Yes                                                 | 130 | 205 | Reference          | 1.54 (1.22, 1.94)  | --                  |
| <b>Receipt of Hormone Therapy (ER+ tumors only)</b> |     |     |                    |                    |                     |
| No                                                  | 161 | 267 | 1.66 (1.23, 2.24)  | 2.50 (1.88, 3.32)  | 0.03 (-0.71, 0.77)  |
| Yes                                                 | 158 | 221 | Reference          | 1.81 (1.44, 2.28)  | --                  |
| <b>Receipt of Trastuzumab (HER2+ tumors only)</b>   |     |     |                    |                    |                     |
| No                                                  | 283 | 414 | 2.09 (1.16, 3.77)  | 2.73 (1.61, 4.61)  | -0.24 (-1.75, 1.28) |
| Yes                                                 | 36  | 74  | Reference          | 1.88 (1.17, 3.00)  | --                  |

\*Adjusted for age; stage; subtype; receipt of surgery, chemotherapy, radiation, hormone therapy, and trastuzumab; insurance status

**Supplemental Table 3.** Multivariable adjusted\* hazard ratios (HR) and 95% confidence intervals (95% CI) for breast cancer-specific death according to race and patient characteristics among non-Hispanic White (NHW) and non-Hispanic Black (NHB) women diagnosed with breast cancer in the metropolitan Atlanta area 2010–2014 and registered with the Georgia Cancer Registry.

| Characteristics                   | No. Deaths |          | Common Referent HR (95% CI) |                   | RERI (95% CI)       |
|-----------------------------------|------------|----------|-----------------------------|-------------------|---------------------|
|                                   | NHW<br>N   | NHB<br>N | NHW<br>HR (95% CI)          | NHB               |                     |
| <b>Insurance Type<sup>†</sup></b> |            |          |                             |                   |                     |
| Uninsured                         | 8          | 36       | 1.56 (0.78, 3.28)           | 2.00 (1.34, 2.99) | -0.20 (-1.56, 1.16) |
| Private Insurance                 | 147        | 212      | Reference                   | 1.60 (1.28, 2.00) | --                  |

|                       |                            |     |     |                    |                    |                      |
|-----------------------|----------------------------|-----|-----|--------------------|--------------------|----------------------|
|                       | Medicaid                   | 18  | 93  | 1.56 (0.94, 2.59)  | 1.84 (1.40, 2.43)  | -0.32 (-1.22, 0.58)  |
|                       | Medicare                   | 133 | 131 | 1.17 (0.88, 1.57)  | 1.72 (1.31, 2.25)  | -0.060 (-0.53, 0.41) |
| <b>Age Group</b>      |                            |     |     |                    |                    |                      |
|                       | <40                        | 15  | 49  | 0.44 ( 0.24, 0.79) | 0.80 (0.53, 1.19)  | 0.01 (-0.43, 0.46)   |
|                       | 40-49                      | 39  | 102 | 0.53 ( 0.35, 0.81) | 0.90 (0.64, 1.27)  | 0.02 (-0.37, 0.42)   |
|                       | 50-65                      | 124 | 210 | 0.77 (0.56, 1.06)  | 1.05 (0.78, 1.42)  | -0.06 (-0.44, 0.31)  |
|                       | >65                        | 141 | 127 | Reference          | 1.35 (1.04, 1.74)  | --                   |
| <b>Marital Status</b> |                            |     |     |                    |                    |                      |
|                       | Married                    | 139 | 144 | Reference          | 1.76 (1.37, 2.25)  | --                   |
|                       | Single                     | 47  | 170 | 1.20 (0.84, 1.71)  | 1.76 (1.37, 2.25)  | -0.20 (0.79, 0.39)   |
|                       | Divorced/Widowed/Separated | 116 | 143 | 1.53 ( 1.16, 2.01) | 1.68 (1.30, 2.16)  | -0.20 (0.79, 0.39)   |
| <b>SES Index</b>      |                            |     |     |                    |                    |                      |
|                       | 0% - <5% poverty           | 71  | 25  | Reference          | 2.05 (1.25, 3.35)  | --                   |
|                       | 5% - <10% poverty          | 96  | 57  | 1.50 (1.08, 2.09)  | 1.86 (1.28, 2.70)  | -0.69 (-1.82, 0.44)  |
|                       | 10% - <20% poverty         | 99  | 167 | 1.59 (1.14, 2.20)  | 2.06 ( 1.52, 2.79) | -0.57 (-1.62, 0.48)  |
|                       | 20% - 100% poverty         | 53  | 239 | 1.51 (1.03, 2.21)  | 2.01 (1.51, 2.69)  | -0.54 (-1.62, 0.53)  |

---

\*Adjusted for age; stage; subtype; receipt of surgery, chemotherapy, radiation, hormone therapy, and trastuzumab; insurance status

‡ Military/other not estimated due to small cell size
